# Supplementary material for: Mesocrystal precursor transformation strategy for synthesizing ordered hierarchical hollow TiO2 nanobricks with enhanced photocatalytic property
Source: Royal Society of Chemistry journal article supplement (doi:10.1039/c3ce41970c), 2013-12-09
Supplement: c3ce41970c.pdf [file c3ce41970c.pdf]

Electronic supplementary information for  
**Mesocrystal precursor transformation strategy synthesizing  
ordered hierarchical hollow TiO<sub>2</sub> nanobricks with enhanced  
photocatalytic property**

Zhen Fang,<sup>\*a</sup> Liuyang Long,<sup>a</sup> Shenghua Hao,<sup>a</sup> Yixuan Song,<sup>a</sup>  
Tingting Qiang<sup>a</sup> and Baoyou Geng<sup>a</sup>

<sup>a</sup> Key Laboratory of Functional Molecular Solids, Ministry of Education. Center for Nano Science and Technology. College of Chemistry and Materials Science, Anhui Normal University, Wuhu, 241000, P. R. China; E-mail: fzfsen@mail.ahnu.edu.cn

## 1. Experimental results

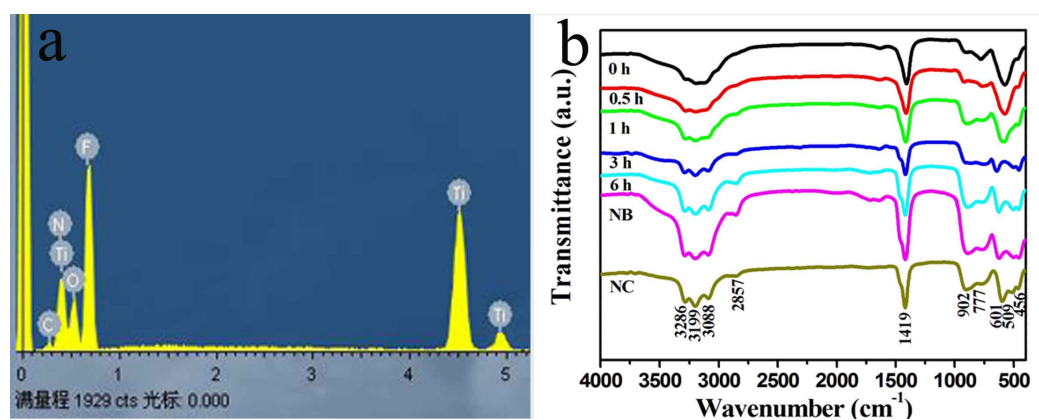

**Fig. S1** (a) EDS spectrum of NB (b) FTIR spectra of NB as well as the precipitate obtained at different time in synthesizing NB.

FT-IR absorption bands at wavenumbers of 3286, 3199, and 3088 cm<sup>-1</sup> for the samples are ascribed to the stretching modes of NH<sub>4</sub><sup>+</sup>. The signals at 1419 and 2857 cm<sup>-1</sup> are ascribed to the bending mode of NH<sub>4</sub><sup>+</sup> and its overtone band. The signal at 902 cm<sup>-1</sup> is indicative stretching mode of

Ti=O (terminal oxygen). The signal at  $601\text{ cm}^{-1}$  is ascribed to the stretching modes of Ti-F, and signals at  $509\text{ cm}^{-1}$  and  $456\text{ cm}^{-1}$  are ascribed to Ti-O. The signal of  $777\text{ cm}^{-1}$  is due to a combination of lattice modes of Ti-O and Ti-F.<sup>1-3</sup>

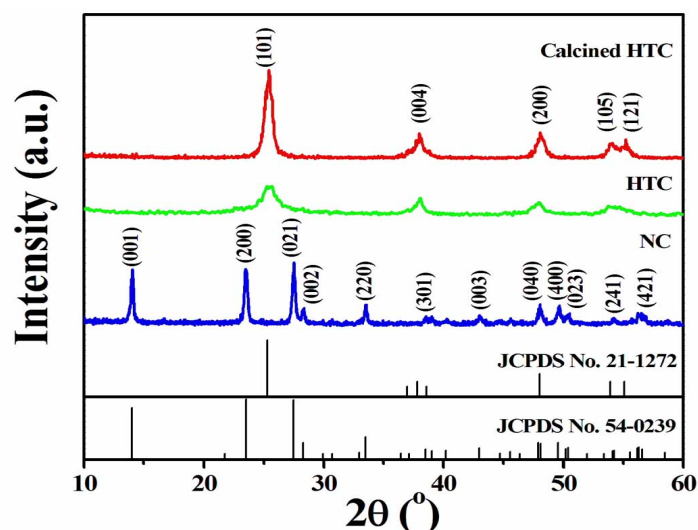

**Fig. S2** XRD patterns of NC, HTC and calcined HTC.

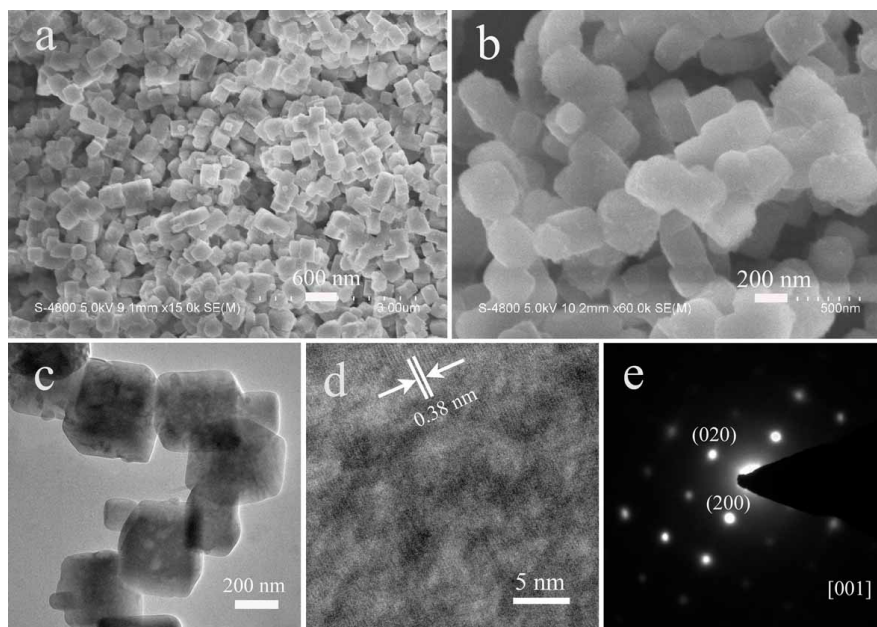

**Fig. S3** (a) SEM and (b) high magnification SEM images of mesocrystal  $\text{NH}_4\text{TiOF}_3$  NC, (c) TEM image, (d) HRTEM image and (e) SAED pattern of the mesocrystal  $\text{NH}_4\text{TiOF}_3$  nanocubes.

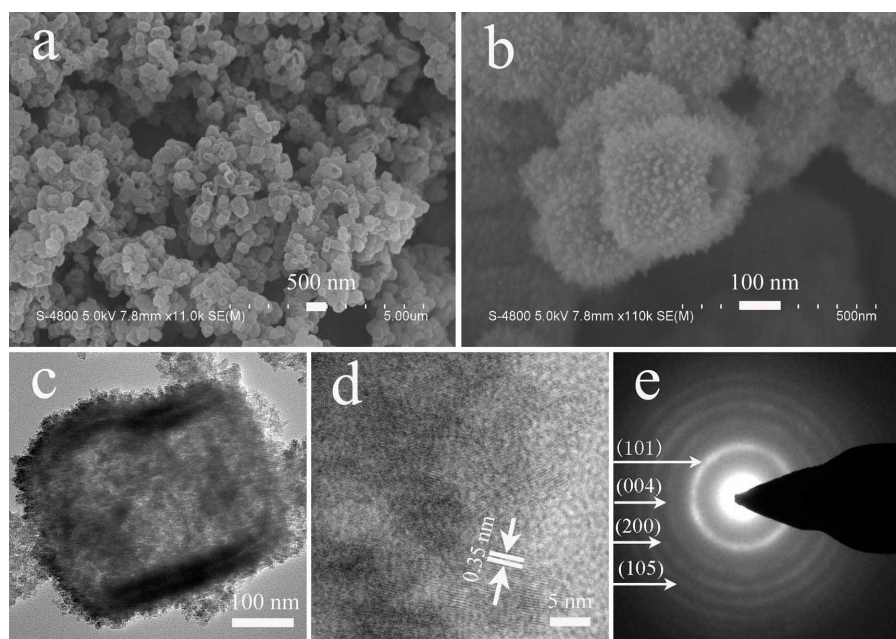

**Fig. S4** (a) SEM, (b) high magnification SEM images and (c) TEM image of HTC, (d) HRTEM image of the nanothorns of HTC. (e) SAED pattern of the hollow  $\text{TiO}_2$  nanocubes (HTC).

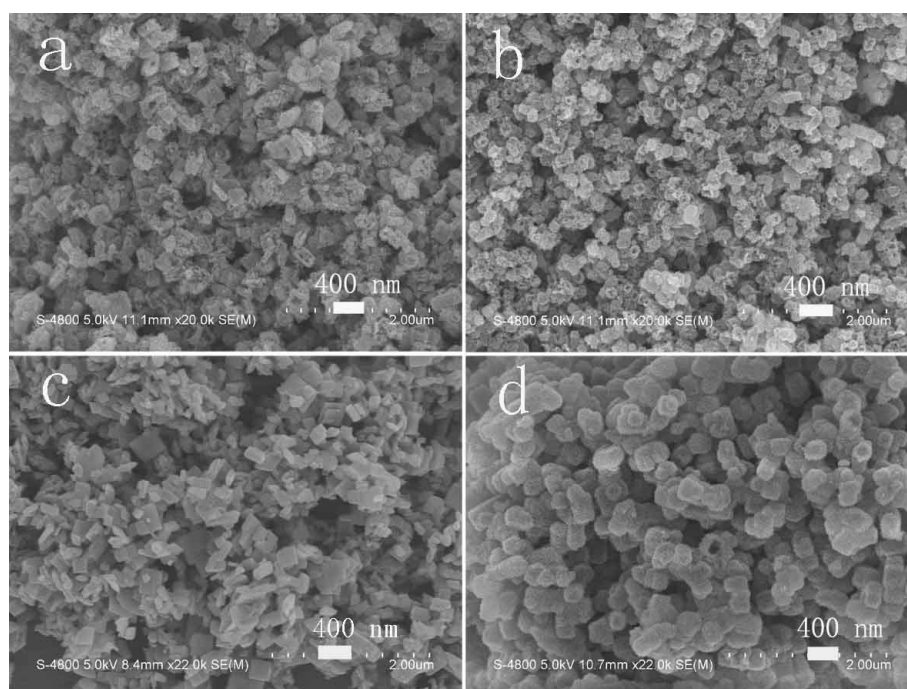

**Fig. S5** SEM images of different anatase  $\text{TiO}_2$  samples (a) the calcined HTB (b) the calcined HTC (c) STB (d) HTC.

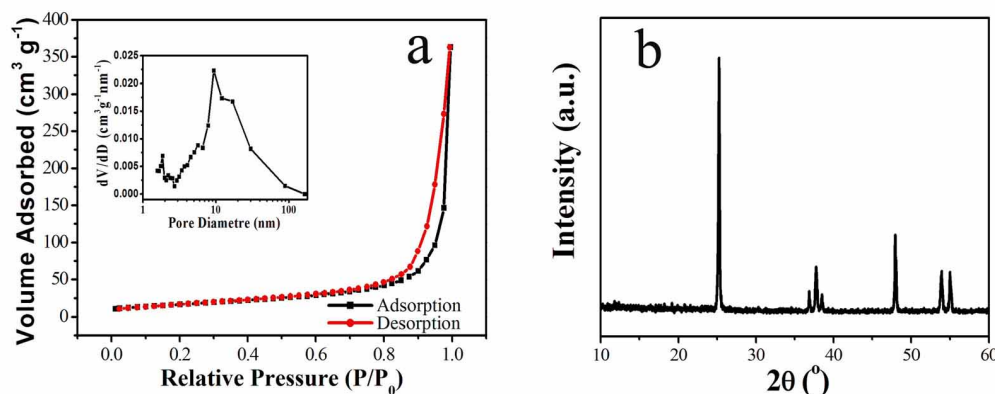

**Fig. S6** (a) N<sub>2</sub> sorption isotherm and the corresponding pore size distribution (inset) of the calcined HTC. (b) XRD pattern of solid TiO<sub>2</sub> nanobrick (STB). (JCPDS No. 21-1272)

**Table S1** BET results of the different synthesized samples.

| Sample       | Pore diameter (nm) | Pore volume (cm <sup>3</sup> g <sup>-1</sup> ) | Specific surface area (m <sup>2</sup> g <sup>-1</sup> ) |
|--------------|--------------------|------------------------------------------------|---------------------------------------------------------|
| NC           | 1-3                | 0.043                                          | 5.56                                                    |
| NB           | 1-3                | 0.056                                          | 8.75                                                    |
| STB          | 1-4                | 0.108                                          | 22.74                                                   |
| HTC          | 7.0                | 0.422                                          | 54.75                                                   |
| HTB          | 16.4               | 0.466                                          | 67.42                                                   |
| Calcined HTC | 10.2               | 0.562                                          | 60.37                                                   |
| Calcined HTB | 17.8               | 1.640                                          | 68.20                                                   |

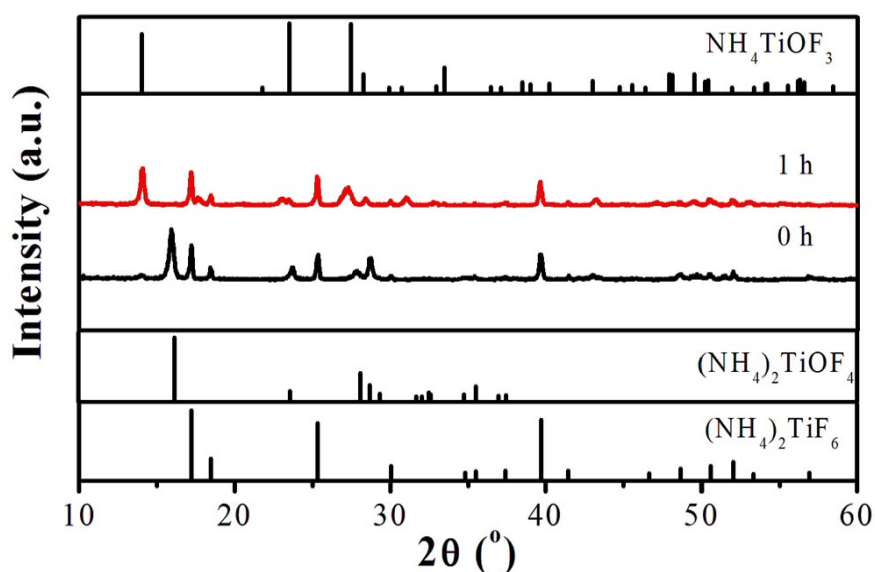

**Fig. S7** XRD patterns of samples collected at different time in synthesizing mesocrystal  $\text{NH}_4\text{TiOF}_3$  nanocube (0 h and 1 h)

At 0 h, the main phase of product is  $(\text{NH}_4)_2\text{TiOF}_4$ , accompanied with some amounts of  $(\text{NH}_4)_2\text{TiF}_6$ , and the least  $\text{NH}_4\text{TiOF}_3$ . When time increased to 1 h, only two phases existed containing  $(\text{NH}_4)_2\text{TiF}_6$  and  $\text{NH}_4\text{TiOF}_3$ , and the  $\text{NH}_4\text{TiOF}_3$  became the main phase. While at 0 h and 1 h in synthesizing  $\text{NH}_4\text{TiOF}_3$  nanobrick, the main phase is both  $(\text{NH}_4)_2\text{TiF}_6$ .

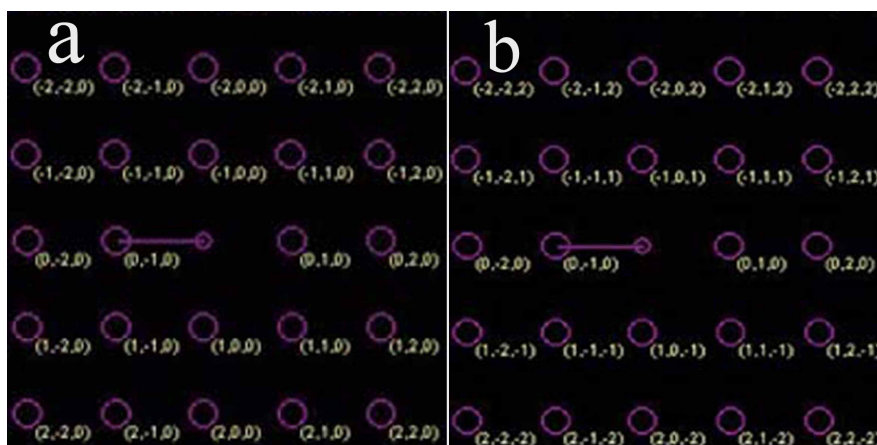

**Fig. S8** Simulated electronic diffraction pattern of (a)  $\text{NH}_4\text{TiOF}_3$  [001] direction (Orthorhombic, cell parameters:  $a = 7.5521$ ,  $b = 7.5845$ ,  $c = 6.3038$   $\langle 90.0 \times 90.0 \times 90.0 \rangle$ ) and (b)  $\text{TiO}_2$  [010] direction (Tetragonal, cell parameters:  $a = 3.7852$ ,  $b = 3.7852$ ,  $c = 9.5139$   $\langle 90.0 \times 90.0 \times 90.0 \rangle$ )

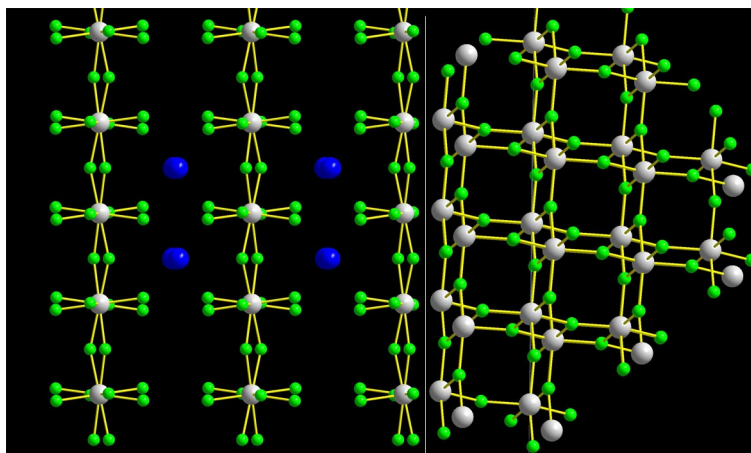

**Fig. S9** Simulated crystal structure of the growth interface. (white spheres: Ti, green spheres: O/F, blue spheres: N)

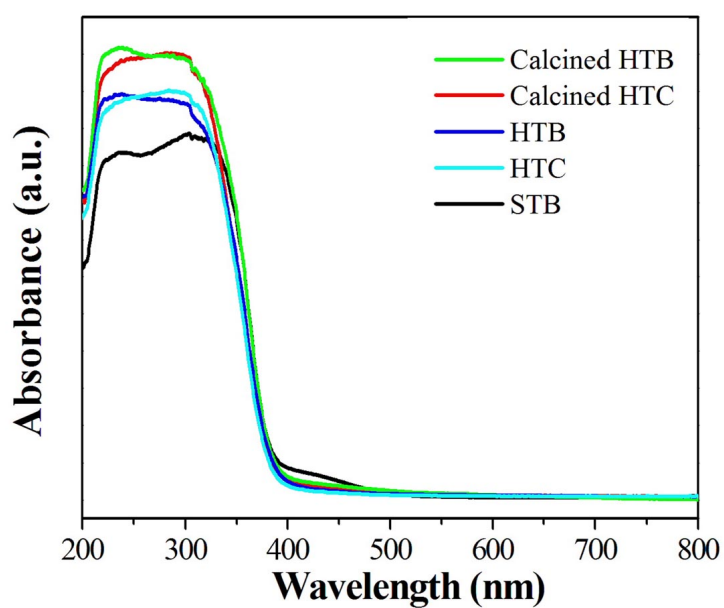

**Fig. S10** UV-vis diffuse reflectance spectra of different prepared samples of TiO<sub>2</sub>

## References

1. L. Zhou, D. S. Boyle, P. O'Brien, *Chem. Commun.*, 2007, 144-146.
2. G. S. Shao, X. J. Zhang, Z. Y. Yuan, *Appl. Catal. B*, 2008, **82**, 208-218.
3. Y. Q. Liu, Y. Zhang, H. Li, and J. Wang, *Cryst. Growth Des.*, 2012, **12**, 2625-2633.
